# Mortality among adults living with HIV treated for tuberculosis based on positive, negative, or no bacteriologic test results for tuberculosis: the IeDEA consortium

John M Humphrey<sup>1\*</sup>, Philani Mpofo<sup>2</sup>, April C. Pettit<sup>3,4</sup>, Beverly Musick<sup>2</sup>, E. Jane Carter<sup>5</sup>,  
Eugene Messou<sup>6,7</sup>, Olivier Marcy<sup>6,8</sup>, Brenda Crabtree-Ramirez<sup>9</sup>, Marcel Yotebieng<sup>10</sup>, Kathryn  
Anastos<sup>11</sup>, Timothy R. Sterling<sup>3,4</sup>, Constantin Yiannoutsos<sup>2</sup>, Lameck Diero<sup>12</sup>, Kara Wools-  
Kaloustian<sup>1</sup>, International Epidemiology Databases to Evaluate AIDS (IeDEA) Consortium<sup>^</sup>

<sup>1</sup> Department of Medicine, Indiana University School of Medicine, Indianapolis, IN, United States

<sup>2</sup> Department of Biostatistics, Indiana University Fairbanks School of Public Health, Indianapolis, IN, United States

<sup>3</sup> Vanderbilt University Medical Center, Nashville, TN, United States

<sup>4</sup> Vanderbilt Tuberculosis Center, Nashville, TN, United States

<sup>5</sup> Department of Medicine, Brown University School of Medicine, Providence, RI, United States

<sup>6</sup> University of Bordeaux, Centre INSERM U1219, Bordeaux Population Health, Bordeaux, France

<sup>7</sup> Centre de Prise en charge de Recherche et de Formation (Aconda-CePReF), Abidjan, Côte d'Ivoire

<sup>8</sup> Epidemiology and Public Health Unit, Institut Pasteur du Cambodge, Phnom Penh, Cambodia

<sup>9</sup> Instituto Nacional de Ciencias Médicas y Nutrición Salvador Zubirán, Mexico City, Mexico

<sup>10</sup> The Ohio State University, College of Public Health, Columbus, OH, United States

<sup>11</sup> Department of Medicine, Albert Einstein College of Medicine, Bronx, NY, United States

<sup>12</sup> Department of Medicine, Moi University College of Health Sciences, Eldoret, Kenya

\* Corresponding author

E-mail: [humphrjm@iu.edu](mailto:humphrjm@iu.edu)

<sup>^</sup> Membership in the IeDEA consortium for the participating programs is provided in the Supporting Information (S8 Table).

Short title: Mortality among adults with HIV treated for TB

## 1 **Abstract**

## 2 **Background**

3 In resource-constrained settings, people living with HIV (PLWH) treated for tuberculosis (TB)  
4 despite negative bacteriologic tests have a higher mortality than those treated with positive tests.  
5 Many PLWH are treated without bacteriologic testing; their mortality compared to those with  
6 bacteriologic testing is uncertain.

## 7 8 **Methods**

9 We conducted an observational cohort study among PLWH  $\geq 15$  years of age who initiated TB  
10 treatment at clinical sites affiliated with four regions of the International epidemiology Databases  
11 to Evaluate AIDS (IeDEA) consortium from 2012-2014: Caribbean, Central and South America,  
12 and Central, East, and West Africa. The primary exposure of interest was the TB bacteriologic  
13 test status at TB treatment initiation: positive, negative, or no test result. The hazard for death in  
14 the 12 months following TB treatment initiation was estimated using the Cox proportional  
15 hazard model, adjusted for patient- and site-level factors. Missing covariates were multiply  
16 imputed.

## 17 18 **Results**

19 Among 2,091 PLWH included, the median age at TB treatment initiation was 36 years, 44%  
20 were female, 53% had CD4 counts  $\leq 200$  cells/mm<sup>3</sup>, and 52% were on antiretroviral treatment  
21 (ART). Compared to patients with positive bacteriologic tests, the adjusted hazard for death was  
22 higher among patients with no test results (HR 1.56, 95% CI 1.08-2.26) but not different than

23 those with negative tests (HR 1.28, 95% CI 0.91-1.81). Older age was also associated with a  
24 higher hazard for death, while being on ART, having a higher CD4 count, West Africa region,  
25 and tertiary facility level were associated with lower hazards for death.

26

## 27 **Conclusion**

28 PLWH treated for TB with no bacteriologic test results were more likely to die than those treated  
29 with positive tests, underscoring the importance of TB bacteriologic diagnosis in resource-  
30 constrained settings. Research is needed to understand the causes of death among PLWH treated  
31 for TB in the absence of positive bacteriologic tests.

## 32 **Introduction**

33 Although tuberculosis (TB) accounted for 300,000 deaths among people living with HIV  
34 (PLWH) in 2017, diagnosing TB in resource-limited settings remains a challenge [1]. In 2017,  
35 only 56% of the 5.5 million pulmonary TB cases reported to the World Health Organization  
36 (WHO) globally were bacteriologically confirmed (i.e. positive for smear microscopy, culture, or  
37 nucleic acid amplification test [NAAT]) [1]. Among studies reporting the autopsy prevalence of  
38 TB in HIV-related deaths, TB was prevalent in 37% of deaths, but in half of those cases, TB was  
39 not diagnosed by the time of death [2]. The rollout of nucleic acid amplification tests (NAAT)  
40 such as the Xpert® MTB/RIF (Cepheid, Sunnyvale, CA, USA), which are more sensitive and  
41 specific than smear microscopy, has helped close this diagnostic gap [3]. However, limited  
42 impact on mortality has been observed with the use of Xpert MTB/RIF, in part due to high  
43 baseline rates of empiric TB treatment (i.e. based on clinical symptoms or radiographic signs) in  
44 high TB burden settings [3-5]. A better understanding of the risk of death among PLWH in the  
45 context of varying TB test results, or the absence of TB testing, is needed to inform the  
46 management of PLWH treated for TB in resource-limited settings where the risk of TB is high.

47  
48 Acquiring a bacteriologic diagnosis of TB in resource-limited settings can be hampered by  
49 economic, clinical and test-related factors. Despite recent increases in TB diagnostic test  
50 coverage in sub-Saharan Africa, smear microscopy and culture is estimated to be available at  
51 only 1.4 and 0.7 laboratories per 100,000 population, respectively [6, 7]. Many labs in resource-  
52 constrained settings suffer from weak supply systems, outdated equipment, poor quality control,  
53 and insufficient staffing [6, 8-10]. Smear microscopy for acid-fast bacilli (AFB) is often the only  
54 TB test available in such settings but it is poorly sensitive among PLWH, with 30-60% of

55 pulmonary TB cases reported to be smear negative [11-13]. Clinicians may not order  
56 bacteriologic testing for TB among PLWH due to lack of knowledge about TB (or conversely,  
57 knowledge of the limitations of smear microscopy), or in cases of suspected extrapulmonary TB  
58 requiring invasive tissue sampling that is not feasible to perform [5, 8, 14, 15]. Patients may not  
59 be able to produce a sputum sample for bacteriologic testing or access TB testing sites (e.g. for  
60 serial sputum collection) due to the distance or cost of transport [8, 16, 17].

61  
62 Empiric TB treatment in PLWH, either because a bacteriologic test was negative or no test was  
63 performed, is thus common in resource-limited settings [4, 5, 18-20]. However, mortality in the  
64 absence of TB bacteriologic testing is not well defined [21-24]. The objective of this study was  
65 to describe the characteristics and risk of death among PLWH treated for TB in the context of  
66 positive, negative, or no TB bacteriologic test results.

67

## 68 **Materials and Methods**

### 69 **Study setting and patient population**

70 This observational cohort study utilized data previously collected from PLWH who were  
71 enrolled in HIV care programs affiliated with four participating regions of the International  
72 epidemiology Databases to Evaluate AIDS (IeDEA) consortium: Caribbean, Central and South  
73 America (CCASAnet), and Central, East, and West Africa [25]. IeDEA is a National Institutes of  
74 Health (NIH)-funded consortium that pools and harmonizes baseline and follow-up patient data  
75 collected in the context of routine care [26]. All participating facilities provided standard of care  
76 HIV and TB treatment services per their respective national guidelines. The study population  
77 included all PLWH  $\geq 15$  years of age who initiated TB treatment between January 2012 and

78 December 2014. Patients were excluded if an alternative diagnosis was established and TB  
79 therapy was stopped. Recurrent TB cases within the study period were excluded (n = 41), so a  
80 patient could not contribute more than one TB case. Patients receiving a drug-resistant TB  
81 treatment regimen were also excluded, which was defined according to WHO criteria as any  
82 injectable agent (except streptomycin), fluoroquinolones, or oral bacteriostatic agent (e.g. para-  
83 aminosalicylic acid, ethionamide, cycloserine) [27]. The reporting of this study conforms to the  
84 STROBE statement (S1 Table) [28].

85

## 86 **Ethics statement**

87 Independent Ethics Committee (IEC) or Institutional Review Board (IRB) approval for this study  
88 was obtained by each of the local IeDEA sites as well as from the Indiana University IRB (S2  
89 Table).

90

## 91 **Data management**

92 TB cases were identified at participating IeDEA sites through review of local TB registries by  
93 site staff. A standardized, electronic case report form developed in Research Electronic Data  
94 Capture (REDCap) and available in English and French was used to collect medical record data  
95 [29]. Data entry into case report forms was conducted from January 2012 through January 2016  
96 by local IeDEA investigators following medical record review. Patient-level HIV data were  
97 obtained from the IeDEA regional HIV care and treatment data repositories for all patients with  
98 completed case report forms. Site-level data were obtained from surveys of antiretroviral  
99 treatment (ART) sites participating in IeDEA conducted between March 1 and July 1, 2012 [30,  
100 31]. Routine audits were performed to ensure data quality throughout data collection. Regional

101 IeDEA data were transferred to the IeDEA-East Africa Regional Data Center where they were  
102 merged, and additional data quality assessments were undertaken before analysis.

103

## 104 **Study definitions**

105 Adult patients were defined as individuals  $\geq 15$  years of age to be consistent with WHO and  
106 other national and regional TB programs [32, 33]. The primary exposure of interest was the TB  
107 bacteriologic test status at the time of TB treatment initiation: *Positive test* group included  
108 patients with one or more positive results including acid fast bacilli (AFB) smear, culture, or  
109 NAAT; *Negative test* group included patients for whom one or more of these bacteriologic tests  
110 were performed and none were positive; *No test* group includes patients for whom no  
111 bacteriologic test was performed or results reported [34]. Patient-level variables at TB treatment  
112 initiation included: age, sex, body mass index (BMI), ART status at TB treatment initiation (on  
113 ART vs. not on ART), CD4 count (defined as the nearest value within 180 days before or 30  
114 days after TB treatment initiation), TB disease site (pulmonary vs. extrapulmonary, and specific  
115 extrapulmonary site(s)), and type of bacteriologic TB test (smear, culture, NAAT; the specimen  
116 type [e.g. respiratory vs. non-respiratory] was not available). TB disease site was categorized  
117 into pulmonary and extrapulmonary according to the WHO and CDC reporting definitions [32,  
118 34, 35]. Accordingly, pulmonary TB included any case involving the lung parenchyma or  
119 tracheobronchial tree, and miliary TB with lesions in the lungs; extrapulmonary TB included  
120 cases involving organs other than the lungs; cases of combined pulmonary and extrapulmonary  
121 TB were classified as pulmonary TB.

122

123 Site-level variables included IeDEA region (CCASAnet, Central Africa, East Africa, West



124 Africa), setting (urban, peri-urban [i.e. immediately adjoining urban areas], facility level  
125 (secondary [i.e district or provincial facilities] or tertiary [i.e regional or referral facilities]),  
126 availability of specialized clinic/ward on site with dedicated staff for TB patients (on site, off  
127 site, or not available), physical proximity of HIV/TB clinical services (same facility or same day  
128 appointments, cross referral between HIV and TB service points, provision of TB and HIV  
129 services under the same roof, or none of these models), and active screening for TB performed  
130 for all PLWH at enrollment (only symptom screening, symptom screening plus additional  
131 diagnostics, or in case of clinical suspicion). Site-level variables were applied to each patient  
132 within the site as an individual characteristic. The main outcome variable was death. Patients  
133 were followed from TB treatment initiation until death or censoring within the 12 months post-  
134 treatment initiation or June 1, 2015. All the non-death events within the 12 months of follow-up  
135 were considered censored events.

136

## 137 **Data analysis**

138 Patient characteristics were summarized overall and by each bacteriologic test group. Categorical  
139 variables were summarized using frequencies and proportions; continuous variables were  
140 summarized using medians and interquartile ranges. Differences between bacteriologic test  
141 groups were assessed using one-way ANOVA or Kruskal-Wallis tests for continuous variables  
142 and Pearson Chi-squared test or Fisher's exact tests for categorical variables. Cumulative  
143 incidence of survival, stratified by bacteriologic test group, was estimated using the Kaplan-  
144 Meier method. The log-rank test was used for testing equality of survival among the levels of  
145 categorical covariates. The Cox proportional hazard model was used to estimate the univariate  
146 and multivariate associations of covariates and the hazard for death. Independent variables

147 included in this model were sex, age, BMI, CD4 count, ART status at TB treatment initiation,  
148 TB disease site, IeDEA region, and facility level. These variables were selected a priori because  
149 of their associations with adverse TB treatment outcomes in prior studies [21, 36-44]. The other  
150 site variables were not included in the model due to co-linearity with each other and the facility  
151 level variable.

152  
153 The proportional hazards assumption was assessed using the supremum-type goodness of fit test.  
154 The impact of missingness on the observed hazard associations was assessed by refitting the  
155 models after imputing missing covariate values. In this analysis, missing values for CD4 count,  
156 BMI, and ART status at TB treatment initiation were multiply imputed using the fully  
157 conditional specification (FCS), where these covariates were assumed to be jointly distributed  
158 [45]. We did not impute missing values for cases with missing facility level, TB disease site, or  
159 simultaneously missing BMI, ART status, and CD4 count. Imputation followed Rubin's scheme:  
160 missing values were imputed 100 times; Cox proportional hazards models were fit for the 100  
161 complete datasets; and, results were pooled to obtain overall effect estimates [46, 47]. Imputation  
162 analysis was performed using the PROC MI procedure in SAS [48]. Analyses were performed at  
163 the 0.05 alpha level.

164  
165 In a secondary analysis comparing the hazard for death among those with any bacteriologic test  
166 (positive or negative) vs. no test results, we used logistic regression to build a propensity score  
167 model for the log odds of having any bacteriologic test given imbalance of covariates in the test  
168 groups (i.e. any test vs. no test). The independent variables included in this model were the same  
169 as those used in the primary analysis. Missing values for CD4 count, BMI, and ART status were

170 also multiply imputed. The imputation and propensity model were performed as follows: 1)  
171 missing values were imputed separately for those with and without a bacteriologic test; 2)  
172 propensity model was fit; 3) stabilized inverse probability weights (IPWs) were constructed  
173 using the predicted propensities, checking if the mean of weights was close to one (S3 Table); 4)  
174 the proportional hazards model was fit for time to death conditional on having any bacteriologic  
175 test, weighted by the IPWs to obtain an estimate of log hazards ratio and its robust standard error  
176 estimate. These steps were repeated 100 times and the resulting log-hazards ratio estimates and  
177 their standard errors pooled using Rubin's rules.

178

## 179 **Results**

### 180 **Patient and site-level characteristics**

181 Among 2,140 patients in the database, a total of 49 were excluded for initiating TB treatment  
182 outside of the study period (n=32) or before the TB diagnosis date (n=1), documentation errors  
183 (n=13), and receiving TB treatment regimens for drug-resistant TB (n=3). Thus, 2,091 patients  
184 were included in the analysis. These patients received care in 12 countries in the four  
185 participating IeDEA regions (Fig 1).

186

187 **Fig 1. Patients included in the analysis by IeDEA region and country.** Numbers in  
188 parentheses indicate the number of patients contributed by participating IeDEA programs in each  
189 country. Map created in January 2019 by John Humphrey using Tableau Public 2018.3.2  
190 (Tableau Software, Seattle, WA).

191

192 A total of 615 (29%) had positive bacteriologic tests for TB, 907 (43%) had negative tests, and  
193 569 (27%) had no test results (Table 1). The median age was 36 years, 44% were female, and the  
194 median BMI was 19 kg/m<sup>2</sup>. Overall, 52% were on ART at TB treatment initiation, and the

195 proportions of patients in each bacteriologic test group who were on ART at TB treatment  
 196 initiation were: positive test (56%), negative test (52%), and no TB test results (38%) ( $P =$   
 197 0.069). The CD4 count was  $\leq 200$  cells/mm<sup>3</sup> in 53% of patients. A total of 79% had pulmonary  
 198 TB and 20% had extrapulmonary TB; the TB disease site was not specified in 1% of patients.  
 199 The proportions of patients with extrapulmonary TB were significantly different between the  
 200 three bacteriologic groups, with extrapulmonary TB in 35% of patients with no TB test result,  
 201 compared to 8% of patients with a positive test and 19% with a negative test ( $P < 0.001$ ). The  
 202 most commonly reported extrapulmonary sites were bone and joint (34%) and pleura (22%).

203  
 204  
 205

**Table 1. Patient characteristics stratified by TB bacteriologic test status.**

| Characteristic                               | Bacteriologic Test Status         |                                          |                                          |                                           | P value <sup>a</sup> |
|----------------------------------------------|-----------------------------------|------------------------------------------|------------------------------------------|-------------------------------------------|----------------------|
|                                              | Total<br><i>N</i> = 2091<br>n (%) | Positive test<br><i>N</i> = 615<br>n (%) | Negative test<br><i>N</i> = 907<br>n (%) | No test result<br><i>N</i> = 569<br>n (%) |                      |
| Age, median years (IQR)                      | 36 (30-43)                        | 35 (30-42)                               | 36 (30-43)                               | 36 (29-44)                                | 0.779                |
| Female sex                                   | 910 (44)                          | 266 (43)                                 | 385 (42)                                 | 259 (46)                                  | 0.505                |
| BMI, median mg/kg <sup>2</sup> (IQR)         | 19 (17-21)                        | 19 (17-21)                               | 19 (17-21)                               | 20 (17-22)                                | 0.001                |
| Missing                                      | 374 (18)                          | 86 (14)                                  | 89 (10)                                  | 199 (35)                                  |                      |
| <b>ART status at TB treatment initiation</b> |                                   |                                          |                                          |                                           | 0.069                |
| On ART                                       | 1084 (52)                         | 346 (56)                                 | 475 (52)                                 | 216 (38)                                  |                      |
| Not on ART                                   | 790 (38)                          | 215 (35)                                 | 359 (40)                                 | 263 (46)                                  |                      |
| Missing                                      | 217 (10)                          | 54 (9)                                   | 73 (8)                                   | 90 (16)                                   |                      |
| <b>CD4 count, cells/mm<sup>3</sup></b>       |                                   |                                          |                                          |                                           | 0.612                |
| < 100                                        | 716 (34)                          | 204 (33)                                 | 309 (34)                                 | 203 (36)                                  |                      |
| 100-200                                      | 391 (19)                          | 114 (19)                                 | 174 (19)                                 | 103 (18)                                  |                      |
| 201-350                                      | 306 (14)                          | 85 (14)                                  | 148 (16)                                 | 73 (13)                                   |                      |
| 351-500                                      | 161 (8)                           | 44 (7)                                   | 73 (8)                                   | 44 (8)                                    |                      |
| > 500                                        | 118 (6)                           | 36 (6)                                   | 59 (7)                                   | 23 (4)                                    |                      |
| Missing                                      | 399 (19)                          | 132 (21)                                 | 144 (16)                                 | 123 (21)                                  |                      |
| <b>TB disease site<sup>b</sup></b>           |                                   |                                          |                                          |                                           | <0.001               |
| Pulmonary                                    | 1646 (79)                         | 564 (92)                                 | 732 (81)                                 | 350 (62)                                  |                      |
| Miliary                                      | 18 (1)                            | 0 (0)                                    | 13 (2)                                   | 5 (1)                                     | 0.011                |
| Extrapulmonary                               | 422 (20)                          | 49 (8)                                   | 172 (19)                                 | 201 (35)                                  |                      |
| Pleural                                      | 79 (22)                           | 3 (10)                                   | 36 (23)                                  | 40 (20)                                   | <0.001               |
| Lymphatic                                    | 73 (20)                           | 20 (67)                                  | 26 (17)                                  | 27 (13)                                   | 0.149                |
| Bone and/or joint                            | 12 (34)                           | 1 (3)                                    | 5 (3)                                    | 6 (3)                                     | 0.129                |
| Abdominal <sup>c</sup>                       | 34 (10)                           | 3 (10)                                   | 18 (11)                                  | 13 (7)                                    | 0.027                |
| Pericardial                                  | 7 (2)                             | 0 (0)                                    | 4 (3)                                    | 3 (2)                                     | 0.276                |
| Genitourinary                                | 1 (<1)                            | 1 (3)                                    | 0 (0)                                    | 0 (0)                                     | 0.566                |

|                      |        |        |        |        |        |
|----------------------|--------|--------|--------|--------|--------|
| CNS and/or meningeal | 21 (6) | 1 (3)  | 13 (8) | 7 (3)  | 0.042  |
| Laryngeal            | 1 (<1) | 0 (0)  | 1 (1)  | 0 (0)  | 1.000  |
| Other                | 25 (7) | 0 (0)  | 11 (7) | 14 (7) | <0.001 |
| Not specified        | 23 (1) | 2 (<1) | 3 (<1) | 18 (3) | <0.001 |

206 ART, antiretroviral treatment; BMI, body mass index; CNS, central nervous system; IQR, interquartile range; TB,  
207 tuberculosis

208 <sup>a</sup> P values comparing the three groups were calculated using ANOVA F-test, chi-square test, Kruskal-Wallis test,  
209 and Fisher's exact test.

210 <sup>b</sup> Percentages of extrapulmonary sites refer to the total extrapulmonary sites; each patient could have > 1  
211 extrapulmonary site.

212 <sup>c</sup> Includes peritoneum, omentum, liver, spleen, and colon.

213 The East Africa IeDEA region contributed 72% of patients overall (Table 2). In this region,  
214 twice as many patients had a negative bacteriologic test (n=734) compared to a positive test  
215 (n=397) or no test (n=380). In contrast, more than twice as many patients in West Africa had  
216 either a positive (n=40) or negative test (n=52) compared to no test (n=19). Overall, more  
217 patients attended facilities that were peri-urban (47%) than urban (26%) or rural (23%). Among  
218 rural facilities, more patients had a negative test (n=324) than either a positive test (n=84) or no  
219 test results (72). A total of 88% of patients overall attended tertiary facilities, and there were  
220 more patients attending these facilities in the group with negative tests (n=812) than the groups  
221 with positive tests (n=472) or no test results (n=485). Finally, 93% of patients attended facilities  
222 with a specialized TB clinic/ward available on site, 69% attended facilities with same facility or  
223 same day HIV/TB service appointments, and 81% attended facilities with active screening for  
224 TB among all PLWH at enrollment that included symptom screening plus additional diagnostics.  
225 Site-level differences between the three test groups were significant for all characteristics  
226 measured ( $P < 0.001$  for all).  
227

228 **Table 2. Patient distribution by site characteristics, stratified by TB bacteriologic test**  
 229 **status.**  
 230

| Characteristic                                                  | Bacteriologic Test Status |                         |                         |                         | P value <sup>a</sup> |
|-----------------------------------------------------------------|---------------------------|-------------------------|-------------------------|-------------------------|----------------------|
|                                                                 | Total                     | Positive test           | Negative test           | No test                 |                      |
|                                                                 | <i>N</i> = 2091<br>n (%)  | <i>N</i> = 615<br>n (%) | <i>N</i> = 907<br>n (%) | <i>N</i> = 569<br>n (%) |                      |
| <b>IeDEA region</b>                                             |                           |                         |                         |                         | <0.001               |
| CCASAnet                                                        | 313 (15)                  | 126 (21)                | 77 (8)                  | 110 (19)                |                      |
| Central Africa                                                  | 156 (8)                   | 52 (8)                  | 44 (5)                  | 60 (11)                 |                      |
| East Africa                                                     | 1511 (72)                 | 397 (64)                | 734 (81)                | 380 (67)                |                      |
| West Africa                                                     | 111 (5)                   | 40 (7)                  | 52 (6)                  | 19 (3)                  |                      |
| <b>Setting</b>                                                  |                           |                         |                         |                         | <0.001               |
| Urban                                                           | 537 (26)                  | 198 (32)                | 151 (17)                | 188 (33)                |                      |
| Peri-urban                                                      | 986 (47)                  | 286 (46)                | 393 (43)                | 307 (54)                |                      |
| Rural                                                           | 480 (23)                  | 84 (14)                 | 324 (36)                | 72 (13)                 |                      |
| Missing                                                         | 88 (4)                    | 47 (8)                  | 39 (4)                  | 2 (<1)                  |                      |
| <b>Facility level</b>                                           |                           |                         |                         |                         | <0.001               |
| Secondary                                                       | 234 (12)                  | 96 (15)                 | 56 (6)                  | 82 (14)                 |                      |
| Tertiary                                                        | 1769 (88)                 | 472 (77)                | 812 (90)                | 485 (85)                |                      |
| Missing                                                         | 88 (4)                    | 47 (8)                  | 39 (4)                  | 2 (<1)                  |                      |
| <b>Specialized TB clinic/ward on site</b>                       |                           |                         |                         |                         | <0.001               |
| Yes, on site                                                    | 1951 (93)                 | 550 (89)                | 858 (95)                | 543 (95)                |                      |
| Yes, off site / by referral                                     | 20 (1)                    | 3 (<1)                  | 5 (<1)                  | 12 (2)                  |                      |
| Not available                                                   | 32 (2)                    | 15 (2)                  | 5 (<1)                  | 12 (2)                  |                      |
| Missing                                                         | 88 (4)                    | 47 (8)                  | 39 (4)                  | 2 (<1)                  |                      |
| <b>Physical proximity of HIV/TB services</b>                    |                           |                         |                         |                         | <0.001               |
| Same facility or same day appointments                          | 1440 (69)                 | 341 (55)                | 709 (78)                | 390 (69)                |                      |
| Cross referral between HIV and TB service points                | 401 (19)                  | 158 (26)                | 84 (9)                  | 159 (28)                |                      |
| Provision of TB and HIV services under the same roof            | 114 (5)                   | 52 (8)                  | 44 (5)                  | 18 (3)                  |                      |
| None of these models                                            | 48 (2)                    | 17 (3)                  | 31 (3)                  | 0 (0)                   |                      |
| Missing                                                         | 88 (4)                    | 47 (8)                  | 39 (4)                  | 2 (<1)                  |                      |
| <b>Active screening for TB for all PLWH at enrollment</b>       |                           |                         |                         |                         | <0.001               |
| All, but only symptom screening                                 | 199 (10)                  | 91 (15)                 | 32 (4)                  | 76 (13)                 |                      |
| All, symptom screening plus additional diagnostics <sup>b</sup> | 1689 (81)                 | 425 (69)                | 785 (86)                | 479 (84)                |                      |
| In case of clinical suspicion                                   | 115 (5)                   | 52 (8)                  | 51 (6)                  | 12 (2)                  |                      |
| Missing                                                         | 88 (4)                    | 47 (8)                  | 39 (4)                  | 2 (<1)                  |                      |

231 CCASAnet, Caribbean, Central and South America; PLWH, people living with HIV; TB, tuberculosis  
 232 <sup>a</sup> ANOVA F-test, chi-square test, Kruskal-Wallis test, Fisher's exact test performed for each variable as  
 233 appropriate.

234 <sup>b</sup> Additional testing examples include sputum AFB, sputum induction, gastric lavage, tissue biopsy, chest  
 235 x-ray, gene x-pert, urine lipoarabinomannan (LAM), tuberculin skin testing.

236 AFB smear was performed in 71% of patients (1,493 of 2,091) (Table 3). Culture and NAAT  
 237 were performed in 8% and 3% of patients, respectively. Among 618 patients with a positive test  
 238 (whereby  $\geq 1$  test type may be performed for each patient), 90% had a positive AFB smear, 16%  
 239 had a positive culture, and 6% had a positive NAAT. Among 907 patients with a negative test  
 240 (also including  $\geq 1$  test type), 99% had a negative AFB smear, 6% had a negative culture, and  
 241 3% had a negative NAAT. Among patients who had results from more than one test type  
 242 reported, 75% with a positive AFB smear also had a positive culture (64 of 85) and 35% with a  
 243 negative AFB smear also had a positive culture (27 of 78) (S4 Table). Among those who had  
 244 AFB smear and NAAT results reported, 63% with a positive smear had a positive NAAT (10 of  
 245 16) and 38% with a negative smear had a positive NAAT (14 of 37).

246

247 **Table 3. Summary of bacteriologic test results.**

248

| Characteristic                    | Bacteriologic Test Status |                         |                         |
|-----------------------------------|---------------------------|-------------------------|-------------------------|
|                                   | Total tests               | Positive test           | Negative test           |
|                                   | <i>N</i> = 2091<br>n (%)  | <i>N</i> = 615<br>n (%) | <i>N</i> = 907<br>n (%) |
| <b>AFB smear</b>                  |                           |                         |                         |
| Positive                          | 553 (26)                  | 553 (90)                | 0 (0)                   |
| Negative                          | 940 (45)                  | 41 (7)                  | 899 (99)                |
| Not performed / no result         | 598 (29)                  | 21 (3)                  | 8 (1)                   |
| <b>Culture</b>                    |                           |                         |                         |
| Positive                          | 98 (5)                    | 98 (16)                 | 0 (0)                   |
| Negative                          | 75 (4)                    | 22 (4)                  | 53 (6)                  |
| Not performed / no result         | 1918 (91)                 | 495 (80)                | 854 (94)                |
| <b>Nucleic acid amplification</b> |                           |                         |                         |
| Positive                          | 38 (2)                    | 38 (6)                  | 0 (0)                   |
| Negative                          | 34 (2)                    | 11 (2)                  | 23 (3)                  |
| Not performed / no result         | 2019 (96)                 | 566 (92)                | 884 (97)                |

249 AFB, acid-fast bacilli

250

## 251 **Mortality outcome**



252 A total of 243 (12%) deaths were reported in the study cohort: 64 (10%) deaths among those  
253 with a positive test, 99 (11%) among those with a negative test, and 80 (14%) in those with no  
254 test results ( $P = 0.099$ ). The ordering of the survival function in the Kaplan-Meier curve  
255 suggested a significant difference in the cumulative incidence of survival between the three  
256 bacteriologic test groups. ( $P = 0.017$ ) (Fig 2).

257

258 **Fig 2. Cumulative incidence of survival after TB treatment initiation, stratified by TB**  
259 **bacteriologic test status.** Red, positive test group; blue, negative test group; grey, no test result  
260 group.  
261

## 262 **Complete case analyses**

263 In the unadjusted and adjusted complete case analyses (adjusted for age, sex, BMI, ART status at  
264 TB treatment initiation, CD4 count, TB disease site, region, and facility level), the hazards of  
265 death were not significantly higher for those treated for TB with no TB bacteriologic test results  
266 (adjusted HR [aHR] 0.87, 95% CI 0.49-1.55) or negative TB tests (aHR 1.19, 95% CI 0.73-1.93)  
267 compared to those with positive tests (Table 4). Factors significantly associated with a lower  
268 hazard for death in the unadjusted and adjusted analyses included being on ART at TB treatment  
269 initiation (aHR 0.57, 95% CI 0.39-0.84) and having a higher CD4 count at TB treatment  
270 initiation (e.g. compared to those with CD4 count  $< 100$  cells/mm<sup>3</sup>, the aHR for death among  
271 those with a CD4 count of 100-200 cells/mm<sup>3</sup> was 0.39, 95% CI 0.23-0.65).

272

273 **Table 4. Hazard ratios for death within 12 months following TB treatment initiation.**  
274

| Characteristic                               | Complete Case Analysis <sup>a</sup>             |                                                            | Multiple Imputation Analysis <sup>b</sup>       |                                                            |
|----------------------------------------------|-------------------------------------------------|------------------------------------------------------------|-------------------------------------------------|------------------------------------------------------------|
|                                              | Unadjusted HR<br><i>N</i> = 1258<br>HR (95% CI) | Adjusted HR <sup>c</sup><br><i>N</i> = 1258<br>HR (95% CI) | Unadjusted HR<br><i>N</i> = 1953<br>HR (95% CI) | Adjusted HR <sup>c</sup><br><i>N</i> = 1953<br>HR (95% CI) |
| <b>Bacteriologic Test</b>                    |                                                 |                                                            |                                                 |                                                            |
| Positive                                     | 1 (Ref.)                                        | 1 (Ref.)                                                   | 1 (Ref.)                                        | 1 (Ref.)                                                   |
| Negative                                     | 1.34 (0.86-2.09)                                | 1.19 (0.73-1.93)                                           | 1.18 (0.85-1.64)                                | 1.28 (0.91-1.81)                                           |
| None                                         | 1.21 (0.70-2.08)                                | 0.87 (0.49-1.55)                                           | 1.57 (1.11-2.23)                                | 1.56 (1.08-2.26)                                           |
| <b>Age (years)</b>                           | 1.01 (0.99-1.03)                                | 1.01 (0.99-1.02)                                           | 1.02 (1.004-1.03)                               | 1.02 (1.003-1.03)                                          |
| <b>Sex</b>                                   |                                                 |                                                            |                                                 |                                                            |
| Female                                       | 1 (Ref.)                                        | 1 (Ref.)                                                   | 1 (Ref.)                                        | 1 (Ref.)                                                   |
| Male                                         | 1.23 (0.85-1.78)                                | 1.15 (0.78-1.69)                                           | 1.24 (0.95-1.63)                                | 1.20 (0.91-1.59)                                           |
| <b>BMI (mg/kg<sup>2</sup>)</b>               | 0.97 (0.92-1.02)                                | 0.98 (0.92-1.03)                                           | 0.97 (0.93-1.01)                                | 0.97 (0.93-1.002)                                          |
| <b>ART status at TB treatment initiation</b> |                                                 |                                                            |                                                 |                                                            |
| Not on ART                                   | 1 (Ref.)                                        | 1 (Ref.)                                                   | 1 (Ref.)                                        | 1 (Ref.)                                                   |
| On ART                                       | 0.63 (0.44-0.91)                                | 0.57 (0.39-0.84)                                           | 0.64 (0.48-0.85)                                | 0.61 (0.47-0.80)                                           |
| <b>CD4 count</b>                             |                                                 |                                                            |                                                 |                                                            |
| < 100                                        | 1 (Ref.)                                        | 1 (Ref.)                                                   | 1 (Ref.)                                        | 1 (Ref.)                                                   |
| 100-200                                      | 0.39 (0.23-0.66)                                | 0.39 (0.23-0.65)                                           | 0.66 (0.46-0.95)                                | 0.69 (0.49-0.97)                                           |
| 201-350                                      | 0.44 (0.26-0.75)                                | 0.42 (0.24-0.71)                                           | 0.56 (0.37-0.85)                                | 0.56 (0.38-0.81)                                           |
| 351-500                                      | 0.16 (0.05-0.51)                                | 0.15 (0.05-0.48)                                           | 0.47 (0.25-0.87)                                | 0.46 (0.27-0.79)                                           |
| > 500                                        | 0.21 (0.07-0.66)                                | 0.19 (0.06-0.62)                                           | 0.26 (0.10-0.68)                                | 0.27 (0.12-0.64)                                           |
| <b>TB disease site</b>                       |                                                 |                                                            |                                                 |                                                            |
| Pulmonary                                    | 1 (Ref.)                                        | 1 (Ref.)                                                   | 1 (Ref.)                                        | 1 (Ref.)                                                   |
| Extrapulmonary                               | 1.10 (0.70-1.72)                                | 1.10 (0.68-1.76)                                           | 1.21 (0.88-1.64)                                | 1.09 (0.79-1.51)                                           |
| <b>IeDEA Region</b>                          |                                                 |                                                            |                                                 |                                                            |
| CCASAnet                                     | 1 (Ref.)                                        | 1 (Ref.)                                                   | 1 (Ref.)                                        | 1 (Ref.)                                                   |
| Central Africa                               | 1.04 (0.36-3.01)                                | 1.08 (0.35-3.33)                                           | 0.92 (0.53-1.62)                                | 0.52 (0.27-1.02)                                           |
| East Africa                                  | 0.97 (0.52-1.81)                                | 0.98 (0.49-1.96)                                           | 0.81 (0.58-1.13)                                | 0.77 (0.54-1.11)                                           |
| West Africa                                  | 1.51 (0.62-3.64)                                | 0.89 (0.25-3.22)                                           | 1.06 (0.53-2.10)                                | 0.38 (0.16-0.91)                                           |
| <b>Facility level</b>                        |                                                 |                                                            |                                                 |                                                            |
| Secondary                                    | 1 (Ref.)                                        | 1 (Ref.)                                                   | 1 (Ref.)                                        | 1 (Ref.)                                                   |
| Tertiary                                     | 0.69 (0.40-1.18)                                | 0.63 (0.27-1.47)                                           | 0.61 (0.43-0.88)                                | 0.41 (0.25-0.67)                                           |

275 ART, antiretroviral treatment; BMI, body mass index; CCASAnet, Caribbean, Central and South America; HR,  
276 hazard ratio; CI, confidence interval; Ref., reference; TB, tuberculosis

277 <sup>a</sup> Includes all patients without missing values for the variables listed in the table.

278 <sup>b</sup> Missing values were imputed for CD4 count, BMI, and ART status at TB treatment initiation. This model  
279 includes all patients without missing values for the variables listed in the table, including those for whom CD4,  
280 BMI, and ART status was imputed.

281 <sup>c</sup> Adjusted for all of the variables listed in the table.

## 282 **Multiple imputation analyses**

283 Of 2,091 patients in the study, 1,258 (60%) were complete cases with respect to the analysis  
284 model. Of the 833 subjects with missing values, we did not perform imputation for 138 cases.  
285 Thus, each imputed dataset had 1,953 subjects. After imputation of missing CD4 count, BMI,  
286 and ART status at TB treatment initiation, the unadjusted multiple imputation analysis showed  
287 that the hazard for death was significantly higher among those with no test result compared to  
288 those with a positive test (HR 1.57, 95% CI 1.11-2.23) (Table 4). In this analysis, older age was  
289 significantly associated with a higher hazard for death (HR 1.02, 95% CI 1.004-1.03). Factors  
290 significantly associated with a lower hazard for death included being on ART at TB treatment  
291 initiation (HR 0.64, 95% CI 0.48-0.85), having a higher CD4 count (e.g. HR for those with CD4  
292 count of 100-200 cells/mm<sup>3</sup> was 0.66, 95% CI 0.46-0.95), and tertiary facility level (HR 0.61,  
293 95% CI 0.43-0.88). In the adjusted analysis (adjusted the same covariates as in the complete case  
294 analysis), the hazard for death was significantly associated with having no test result compared  
295 to a positive test (aHR 1.56, 95% CI 1.08-2.26), and there was no difference between those with  
296 a positive test and negative test (aHR 1.28, 95% CI 0.91-1.81). Similar to the unadjusted  
297 analysis, factors associated with a lower hazard for death included being on ART at TB treatment  
298 initiation, having a higher CD4 count and tertiary facility level, as well as West Africa IeDEA  
299 region (aHR 0.38, 95% CI 0.16-0.91).

300

## 301 **Secondary analysis**

302 The propensity model for the log-odds of having any bacteriologic test (positive or negative) vs.  
303 no test result demonstrated that CD4 count, BMI, TB disease site, facility level, and IeDEA  
304 region were each associated with the log odds of having a test (S5 Table). In the odds ratio scale,

305 the adjusted odds of having any test among those with extrapulmonary TB, for example, was  
306 45% lower than the odds for those with pulmonary TB ( $P < 0.0001$ ) (S6 Table). This model was  
307 used to estimate the propensity scores, which were in turn used to compute the stabilized IPWs.  
308 For each of the 100 analyses combining multiple imputation and propensity score analysis, the  
309 stabilized IPWs were found to have an average close to 1. The stabilized IPWs were then used in  
310 fitting 100 adjusted Cox models for time to death conditional on whether or not a bacteriologic  
311 test had been performed (i.e. test vs. no test). The pooled results for the IPW proportional  
312 hazards models demonstrated that the adjusted hazard for death was 28% lower among those  
313 with any bacteriologic test compared to those with no test results, but the effect was not  
314 significant at the 0.05 alpha level (aHR 0.81, 95% CI 0.61-1.07) (S7 Table).

315

## 316 **Discussion**

317 In this study, PLWH treated for TB in our cohorts in the absence of TB bacteriologic test results  
318 had a higher adjusted hazard for death than those treated for TB with positive TB bacteriologic  
319 test results. Unlike those with bacteriologically confirmed TB disease (i.e. the positive test  
320 group), it is plausible that those with no bacteriologic test results were a heterogeneous population  
321 of individuals with TB as well as other life-threatening diseases (e.g. opportunistic infections,  
322 cancers, chronic lung diseases) that may have mimicked TB but advanced untreated while the  
323 patient received TB treatment, resulting in excess mortality. This, along with the 12-month  
324 mortality outcome, suggests that not all patients who initiated TB treatment had TB disease and  
325 not all deaths were TB-attributable.

326

327 Differences in TB disease site or severity between those with positive and no test results may  
328 also have influenced mortality. As expected, the proportion of patients with pulmonary TB was  
329 higher among those with positive tests (92%) compared to those with no test results (62%) ( $P <$   
330 0.001). This reflects the challenge of acquiring a bacteriologic diagnosis in suspected  
331 extrapulmonary TB (which often requires invasive tissue sampling) compared to pulmonary TB  
332 (which requires sputum sampling) in resource-constrained settings. Additionally, bacteriologic  
333 testing for extrapulmonary TB is less sensitive in general compared to pulmonary TB,  
334 extrapulmonary TB is more common in PLWH, certain extrapulmonary TB types (e.g.  
335 disseminated or meningitis) are associated with especially high mortality in PLWH, and  
336 extrapulmonary TB has been associated with delays in diagnosis [40, 42, 43, 49-52]. These  
337 features may also have influenced clinicians to forego bacteriologic testing and initiate empiric  
338 TB treatment among individuals that were already at increased risk of death. TB disease site was  
339 not associated with mortality in our analyses, but we could not account for group variability in  
340 extrapulmonary TB sites that may have influenced this outcome.

341  
342 We also found that PLWH attending tertiary facilities had a lower adjusted hazard for death  
343 compared to those attending secondary facilities. Compared to tertiary facilities, secondary  
344 facilities may have had less capacity to evaluate and manage TB, or its alternative diagnoses, in  
345 PLWH [53]. This finding may also have been biased by differences in the completeness of death  
346 ascertainment between higher and lower-resourced facilities, the latter being potentially more  
347 susceptible to undocumented loss to follow-up or transfer events not captured in our dataset [54].  
348 Differences in vital status ascertainment may also have accounted for the regional differences in  
349 the hazards for death (West Africa vs. CCASAnet) identified in our study.

350

351 Consistent with the literature, we found that being on ART and having higher CD4 count at TB  
352 treatment initiation were both strongly protective against mortality. This underscores the  
353 fundamental importance of early ART initiation and immune preservation on survival, regardless  
354 of the presence or result of TB bacteriologic testing, in resource-constrained settings. Advanced  
355 HIV immunosuppression is known to be a critical risk factor for TB-related mortality (including  
356 mortality  $\geq 1$  year after completion of TB therapy), and the scale-up of ART coverage has been  
357 associated with marked reductions in TB incidence and mortality in countries with high HIV and  
358 TB burdens [20, 21, 40, 41, 55-57].

359

360 We did not find a significant difference in the adjusted hazard for death between those treated for  
361 TB with any bacteriologic test (positive or negative) versus no test results in the secondary  
362 analysis. This finding is consistent with a study in Brazil which found no difference in mortality  
363 risk between PLWH who did or did not undergo TB bacteriologic testing [17]. This argues  
364 against the notion that the presence of TB bacteriologic testing is a marker of better-resourced  
365 sites (and therefore reduced mortality), as patients with a bacteriologic test would have been  
366 expected to have a lower mortality than those who were not tested if that were the case. It is  
367 possible that patients in both groups had similar survival simply by being engaged in facility-  
368 based care.

369

370 Finally, we found no significant difference in the hazard for death between those with positive or  
371 negative TB bacteriologic tests (Fig 2 and Table 3). This lack of significance may in part be  
372 related to limited statistical power, as the adjusted hazard for death in those with negative tests

373 was similar to that for those with no test results (aHR 1.28 vs. 1.56). Nevertheless, this finding  
374 contrasts with prior studies finding that smear-negative TB is associated with increased mortality  
375 compared to smear-positive TB in PLWH. This finding has been attributed to paucibacillary  
376 disease in the setting of advanced HIV, delay in diagnosis, and other opportunistic and non-  
377 communicable diseases [14, 21-23, 58-65]. Similar findings have been shown with respect to  
378 culture results among PLWH treated for TB, but no such studies have been performed for NAAT  
379 to our knowledge [66]. The lack of mortality difference in our study could also be related to the  
380 combination of smear, culture, and NAAT used to define the groups, overdiagnosis of TB in the  
381 negative test group (yielding lower than expected mortality), or higher bacterial burden due to  
382 more extensive TB disease or inadequate treatment of drug-resistant TB in the positive test group  
383 (yielding higher than expected mortality) [67]. The 12-month mortality outcome used in our  
384 study, which was selected due to limitations in the dataset, may also have influenced this finding.  
385 A study from the Democratic Republic of Congo, for example, found that patients treated for  
386 smear-negative TB had a higher risk of death within two months of TB treatment initiation, but  
387 not after, compared to those treated for smear-positive TB [62].  
388  
389 Our study has strengths and limitations. Strengths include its large sample size from diverse  
390 global regions and HIV/TB care programs and use of routine program data which likely reflects  
391 typical care environments in the study settings. The use of routine program data is also a  
392 limitation, as the completeness of vital status ascertainment may have been affected by loss to  
393 follow-up or transfer events not captured in our dataset. We cannot be certain that patients with  
394 no TB bacteriologic test results documented in their records did not actually have testing  
395 performed. Still, the integration of TB-HIV services at the majority of sites supports that TB test

396 results would have been recorded in the medical records and case report forms if they were  
397 available. Few patients had culture or NAAT performed, which limits the generalizability of our  
398 study in settings where these tests are performed more commonly. We used multiple imputation  
399 to reduce bias due to missing data, but the mortality estimate could still be biased if missingness  
400 depended not only on the variables we used to impute missing values but also on the missing  
401 values themselves (i.e., missing not at random).

402

403 In conclusion, PLWH treated for TB with no TB bacteriologic test results in our study were more  
404 likely to die than those who were treated and had positive tests. Every effort should be made to  
405 establish a diagnosis of TB prior to initiating TB treatment in resource-constrained settings.  
406 Further research is needed to understand the causes of death among PLWH treated for TB in the  
407 absence of positive bacteriologic test results.

408

## 409 **Acknowledgements**

410 We are grateful for the participation of the following IeDEA Collaborative sites: Brazil – INI-  
411 Fiocruz; Burundi – CPAMP-CHUK; Côte d'Ivoire – Centre Intégré de Recherches Biocliniques  
412 d'Abidjan (CIRBA), Centre Hospitalier Universitaire de Cocody, CREF/SMIT, Medicine  
413 Interne; Honduras - IHHS; Kenya –AMPATH; Mexico - INCMNSZ; Peru – IMTAvH, CoVIHS;  
414 République Démocratique du Congo – Bomoi Health Centre, Kalembelembe Paediatric Hospital;  
415 Rwanda – Rwanda Military Hospital; Tanzania – National AIDS Control Programme, Tumbi  
416 Regional Hospital, National Institute for Medical Research, Mwanza Research Centre-Kisesa



417 Clinic; Uganda – Masaka Regional Hospital. A complete listing of participating programs and  
418 members can be found in S8 Table.

## References

1. World Health Organisation. Global Tuberculosis Report 2018. Geneva; 2018.
2. Gupta RK, Lucas SB, Fielding KL, Lawn SD. Prevalence of tuberculosis in post-mortem studies of HIV-infected adults and children in resource-limited settings: a systematic review and meta-analysis. *AIDS*. 2015;29(15):1987-2002.
3. Auld AF, Fielding KL, Gupta-Wright A, Lawn SD. Xpert MTB/RIF - why the lack of morbidity and mortality impact in intervention trials? *Trans R Soc Trop Med Hyg*. 2016;110(8):432-44.
4. Clouse K, Blevins M, Lindegren ML, Yotebieng M, Nguyen DT, Omondi A, et al. Low implementation of Xpert MTB/RIF among HIV/TB co-infected adults in the International epidemiologic Databases to Evaluate AIDS (IeDEA) program. *PLoS One*. 2017;12(2):e0171384.
5. Theron G, Zijenah L, Chanda D, Clowes P, Rachow A, Lesosky M, et al. Feasibility, accuracy, and clinical effect of point-of-care Xpert MTB/RIF testing for tuberculosis in primary-care settings in Africa: a multicentre, randomised, controlled trial. *Lancet*. 2014;383(9915):424-35.
6. Onyebujoh PC, Thirumala AK, Piatek A. Stronger tuberculosis laboratory networks and services in Africa essential to ending tuberculosis. *Afr J Lab Med*. 2017;6(2):519.
7. World Health Organisation. Global Tuberculosis Control 2011. Geneva; 2011.
8. Parsons LM, Somoskovi A, Gutierrez C, Lee E, Paramasivan CN, Abimiku A, et al. Laboratory diagnosis of tuberculosis in resource-poor countries: challenges and opportunities. *Clin Microbiol Rev*. 2011;24(2):314-50.
9. Zumla A, Petersen E, Nyirenda T, Chakaya J. Tackling the tuberculosis epidemic in sub-Saharan Africa - unique opportunities arising from the second European Developing Countries Clinical Trials Partnership (EDCTP) programme 2015-2024. *Int J Infect Dis*. 2015;32:46-9.
10. Loveday M, Thomson L, Chopra M, Ndlela Z. A health systems assessment of the KwaZulu-Natal tuberculosis programme in the context of increasing drug resistance. *Int J Tuberc Lung Dis*. 2008;12(9):1042-7.
11. Van Deun A, Salim AH, Cooreman E, Hossain MA, Rema A, Chambugonj N, et al. Optimal tuberculosis case detection by direct sputum smear microscopy: how much better is more? *Int J Tuberc Lung Dis*. 2002;6(3):222-30.
12. Boehme CC, Nicol MP, Nabeta P, Michael JS, Gotuzzo E, Tahirli R, et al. Feasibility, diagnostic accuracy, and effectiveness of decentralised use of the Xpert MTB/RIF test for diagnosis of tuberculosis and multidrug resistance: a multicentre implementation study. *Lancet*. 2011;377(9776):1495-505.
13. World Health Organization. Improving the diagnosis and treatment of smear-negative pulmonary and extra-pulmonary tuberculosis among adults and adolescents: Recommendations for HIV-prevalent and resource-constrained settings. Geneva; 2007.
14. Getahun H, Harrington M, O'Brien R, Nunn P. Diagnosis of smear-negative pulmonary tuberculosis in people with HIV infection or AIDS in resource-constrained settings: informing urgent policy changes. *Lancet*. 2007;369(9578):2042-9.

- 457 15. Roy M, Muyindike W, Vijayan T, Kanyesigye M, Bwana M, Wenger M, et al. Implementation and  
458 Operational Research: Use of Symptom Screening and Sputum Microscopy Testing for Active  
459 Tuberculosis Case Detection Among HIV-Infected Patients in Real-World Clinical Practice in Uganda. *J*  
460 *Acquir Immune Defic Syndr*. 2016;72(5):e86-91.
- 461 16. Elbireer AM OA, Brough RL, Brooks Jackson J, Manabe YC. Strengthening Public Laboratory Service  
462 in Sub-Saharan Africa: Uganda Case Study. *Lab Med*. 2011;42(12):719-25.
- 463 17. Albuquerque Mde F, Coimbra I, Batista J, Maruza M, Ximenes RA, Lacerda HR, et al. Empirical  
464 treatment for TB in HIV: lessons from a cohort study of people living with HIV treated in Recife, Brazil.  
465 *BMC Public Health*. 2014;14:289.
- 466 18. World Health Organization. Improving the diagnosis and treatment of smear-negative pulmonary and  
467 extrapulmonary tuberculosis among adults and adolescents: Recommendations for HIV-prevalence and  
468 resource-constrained settings. Geneva; 2007.
- 469 19. Hanrahan CF, Selibas K, Deery CB, Dansey H, Clouse K, Bassett J, et al. Time to treatment and patient  
470 outcomes among TB suspects screened by a single point-of-care xpert MTB/RIF at a primary care clinic  
471 in Johannesburg, South Africa. *PLoS One*. 2013;8(6):e65421.
- 472 20. Mupfumi L, Makamure B, Chirehwa M, Sagonda T, Zinyowera S, Mason P, et al. Impact of Xpert  
473 MTB/RIF on Antiretroviral Therapy-Associated Tuberculosis and Mortality: A Pragmatic Randomized  
474 Controlled Trial. *Open Forum Infect Dis*. 2014;1(1):ofu038.
- 475 21. Waitt CJ, Squire SB. A systematic review of risk factors for death in adults during and after tuberculosis  
476 treatment. *Int J Tuberc Lung Dis*. 2011;15(7):871-85.
- 477 22. Hargreaves NJ, Kadzakuanja O, Phiri S, Nyangulu DS, Salaniponi FM, Harries AD, et al. What causes  
478 smear-negative pulmonary tuberculosis in Malawi, an area of high HIV seroprevalence? *Int J Tuberc*  
479 *Lung Dis*. 2001;5(2):113-22.
- 480 23. Hargreaves NJ, Kadzakuanja O, Whitty CJ, Salaniponi FM, Harries AD, Squire SB. 'Smear-negative'  
481 pulmonary tuberculosis in a DOTS programme: poor outcomes in an area of high HIV seroprevalence.  
482 *Int J Tuberc Lung Dis*. 2001;5(9):847-54.
- 483 24. Campos LC, Rocha MV, Willers DM, Silva DR. Characteristics of Patients with Smear-Negative  
484 Pulmonary Tuberculosis (TB) in a Region with High TB and HIV Prevalence. *PLoS One*.  
485 2016;11(1):e0147933.
- 486 25. International Epidemiology Databases to Evaluate AIDS (IeDEA) [Internet]. 2018 [Cited 31 January  
487 2019]. Available from: <https://www.iedea.org>.
- 488 26. Egger M, Ekouevi DK, Williams C, Lyamuya RE, Mukumbi H, Braitstein P, et al. Cohort Profile: the  
489 international epidemiological databases to evaluate AIDS (IeDEA) in sub-Saharan Africa. *Int J*  
490 *Epidemiol*. 2012;41(5):1256-64.
- 491 27. World Health Organization. Treatment of tuberculosis: guidelines – 4th ed. Geneva; 2010.
- 492 28. von Elm E, Altman DG, Egger M, Pocock SJ, Gotsche PC, Vandenbroucke JP, et al. The Strengthening  
493 the Reporting of Observational Studies in Epidemiology (STROBE) statement: guidelines for reporting  
494 observational studies. *J Clin Epidemiol*. 2008;61(4):344-9.

- 495 29. Harris PA, Taylor R, Thielke R, Payne J, Gonzalez N, Conde JG. Research electronic data capture  
496 (REDCap)--a metadata-driven methodology and workflow process for providing translational research  
497 informatics support. *J Biomed Inform.* 2009;42(2):377-81.
- 498 30. Charles MK, Lindegren ML, Wester CW, Blevins M, Sterling TR, Dung NT, et al. Implementation of  
499 Tuberculosis Intensive Case Finding, Isoniazid Preventive Therapy, and Infection Control ("Three I's")  
500 and HIV-Tuberculosis Service Integration in Lower Income Countries. *PLoS One.*  
501 2016;11(4):e0153243.
- 502 31. Fenner L, Ballif M, Graber C, Nhandu V, Dusingize JC, Cortes CP, et al. Tuberculosis in antiretroviral  
503 treatment programs in lower income countries: availability and use of diagnostics and screening. *PLoS*  
504 *One.* 2013;8(10):e77697.
- 505 32. World Health Organization. *Global Tuberculosis Report 2017.* Geneva; 2017.
- 506 33. GBD Tuberculosis Collaborators. The global burden of tuberculosis: results from the Global Burden of  
507 Disease Study 2015. *Lancet Infect Dis.* 2018;18(3):261-84.
- 508 34. World Health Organization. *Definitions and reporting framework for tuberculosis – 2013 revision.*  
509 Geneva; 2013.
- 510 35. Centers for Disease Control and Prevention (CDC). *Reported Tuberculosis in the United States, 2016.*  
511 Atlanta, GA: US Department of Health and Human Services, CDC; 2017.
- 512 36. Teklu AM, Nega A, Mamuye AT, Sitotaw Y, Kassa D, Mesfin G, et al. Factors Associated with  
513 Mortality of TB/HIV Co-infected Patients in Ethiopia. *Ethiop J Health Sci.* 2017;27(Suppl 1):29-38.
- 514 37. Dawood H, Hassan-Moosa R, Zuma NY, Naidoo K. Mortality and treatment response amongst HIV-  
515 infected patients 50 years and older accessing antiretroviral services in South Africa. *BMC Infect Dis.*  
516 2018;18(1):168.
- 517 38. Lindan CP, Allen S, Serufulira A, Lifson AR, Van de Perre P, Chen-Rundle A, et al. Predictors of  
518 mortality among HIV-infected women in Kigali, Rwanda. *Ann Intern Med.* 1992;116(4):320-8.
- 519 39. Tabarsi P, Chitsaz E, Moradi A, Baghaei P, Farnia P, Marjani M, et al. Treatment outcome, mortality  
520 and their predictors among HIV-associated tuberculosis patients. *Int J STD AIDS.* 2012;23(9):e1-4.
- 521 40. Schmaltz CA, Santoro-Lopes G, Lourenco MC, Morgado MG, Velasque Lde S, Rolla VC. Factors  
522 impacting early mortality in tuberculosis/HIV patients: differences between subjects naive to and  
523 previously started on HAART. *PLoS One.* 2012;7(9):e45704.
- 524 41. Mugusi FM, Mehta S, Villamor E, Urassa W, Saathoff E, Bosch RJ, et al. Factors associated with  
525 mortality in HIV-infected and uninfected patients with pulmonary tuberculosis. *BMC Public Health.*  
526 2009;9:409.
- 527 42. Kourbatova EV, Leonard MK, Jr., Romero J, Kraft C, del Rio C, Blumberg HM. Risk factors for  
528 mortality among patients with extrapulmonary tuberculosis at an academic inner-city hospital in the US.  
529 *Eur J Epidemiol.* 2006;21(9):715-21.
- 530 43. Kingkaew N, Sangtong B, Amnuaiphon W, Jongpaibulpatana J, Mankatittham W, Akksilp S, et al. HIV-  
531 associated extrapulmonary tuberculosis in Thailand: epidemiology and risk factors for death. *Int J Infect*  
532 *Dis.* 2009;13(6):722-9.

- 533 44. Dangisso MH, Datiko DG, Lindtjorn B. Trends of tuberculosis case notification and treatment outcomes  
534 in the Sidama Zone, southern Ethiopia: ten-year retrospective trend analysis in urban-rural settings.  
535 PLoS One. 2014;9(12):e114225.
- 536 45. van Buuren S. Multiple imputation of discrete and continuous data by fully conditional specification.  
537 Stat Methods Med Res. 2007;16(3):219-42.
- 538 46. Rubin DB. Inference and missing data. Biometrika. 1976;63(3):581-92.
- 539 47. Rubin DB. Multiple imputation for nonresponse in surveys: John Wiley & Sons; 2004.
- 540 48. The MI Procedure: SAS/STAT 14.1 User's Guide; 2008. Available from:  
541 <https://support.sas.com/documentation/onlinedoc/stat/141/mi.pdf>.
- 542 49. Qian X, Nguyen DT, Lyu J, Albers AE, Bi X, Graviss EA. Risk factors for extrapulmonary  
543 dissemination of tuberculosis and associated mortality during treatment for extrapulmonary tuberculosis.  
544 Emerg Microbes Infect. 2018;7(1):102.
- 545 50. Mukadi YD, Maher D, Harries A. Tuberculosis case fatality rates in high HIV prevalence populations in  
546 sub-Saharan Africa. AIDS. 2001;15(2):143-52.
- 547 51. El Sahly HM, Teeter LD, Pan X, Musser JM, Graviss EA. Mortality associated with central nervous  
548 system tuberculosis. J Infect. 2007;55(6):502-9.
- 549 52. Storla DG, Yimer S, Bjune GA. A systematic review of delay in the diagnosis and treatment of  
550 tuberculosis. BMC Public Health. 2008;8:15.
- 551 53. Saito S, Howard AA, Reid MJ, Elul B, Scardigli A, Verkuijl S, et al. TB diagnostic capacity in sub-  
552 Saharan African HIV care settings. J Acquir Immune Defic Syndr. 2012;61(2):216-20.
- 553 54. Bassett IV, Chetty S, Wang B, Mazibuko M, Giddy J, Lu Z, et al. Loss to follow-up and mortality  
554 among HIV-infected people co-infected with TB at ART initiation in Durban, South Africa. J Acquir  
555 Immune Defic Syndr. 2012;59(1):25-30.
- 556 55. Yan I, Bendavid E, Korenromp EL. Antiretroviral Treatment Scale-Up and Tuberculosis Mortality in  
557 High TB/HIV Burden Countries: An Econometric Analysis. PLoS One. 2016;11(8):e0160481.
- 558 56. Au-Yeung C, Kanters S, Ding E, Glaziou P, Anema A, Cooper CL, et al. Tuberculosis mortality in HIV-  
559 infected individuals: a cross-national systematic assessment. Clin Epidemiol. 2011;3:21-9.
- 560 57. Suthar AB, Lawn SD, del Amo J, Getahun H, Dye C, Sculier D, et al. Antiretroviral therapy for  
561 prevention of tuberculosis in adults with HIV: a systematic review and meta-analysis. PLoS Med.  
562 2012;9(7):e1001270.
- 563 58. Djouma FN, Noubom M, Ngomba AV, Donfack H, Kouomboua PS, Saah MA. Determinants of death  
564 among tuberculosis patients in a semi urban diagnostic and treatment centre of Bafoussam, West  
565 Cameroon: a retrospective case-control study. Pan Afr Med J. 2015;22:253.
- 566 59. Lawn SD, Acheampong JW. Pulmonary tuberculosis in adults: factors associated with mortality at a  
567 Ghanaian teaching hospital. West Afr J Med. 1999;18(4):270-4.
- 568 60. Calis J, Bakker ML, Elens RB, Borgdorff M, Harries AD. Mortality in smear-negative tuberculosis  
569 patients in Phalombe. Malawi Med J. 2002;14(2):13-4.

- 570 61. Harries AD, Nyirenda TE, Banerjee A, Boeree MJ, Salaniponi FM. Treatment outcome of patients with  
571 smear-negative and smear-positive pulmonary tuberculosis in the National Tuberculosis Control  
572 Programme, Malawi. *Trans R Soc Trop Med Hyg.* 1999;93(4):443-6.
- 573 62. Henegar C, Behets F, Vanden Driessche K, Tabala M, Bahati E, Bola V, et al. Mortality among  
574 tuberculosis patients in the Democratic Republic of Congo. *Int J Tuberc Lung Dis.* 2012;16(9):1199-  
575 204.
- 576 63. Raviglione MC, Harries AD, Msiska R, Wilkinson D, Nunn P. Tuberculosis and HIV: current status in  
577 Africa. *AIDS.* 1997;11 Suppl B:S115-23.
- 578 64. Onyango DO, Yuen CM, Cain KP, Ngari F, Masini EO, Borgdorff MW. Reduction of HIV-associated  
579 excess mortality by antiretroviral treatment among tuberculosis patients in Kenya. *PLoS One.*  
580 2017;12(11):e0188235.
- 581 65. Macpherson P, Dimairo M, Bandason T, Zezai A, Munyati SS, Butterworth AE, et al. Risk factors for  
582 mortality in smear-negative tuberculosis suspects: a cohort study in Harare, Zimbabwe. *Int J Tuberc  
583 Lung Dis.* 2011;15(10):1390-6.
- 584 66. Crabtree-Ramírez BE JC, Jayathilake K, Carriquiry G, Veloso VG, Padgett D, Gotuzzo E, Cortes C,  
585 Mejia F, McGowan CC, Duda S, Shepherd B, Sterling TR. HIV-related tuberculosis: mortality risk in  
586 persons without vs. culture-confirmed disease. *Int J Tuberc Lung Dis.* Forthcoming 2019.
- 587 67. Zurcher K BM, Fenner L, Borrell S, Keller PM, Gnokoro J. Drug susceptibility testing and mortality in  
588 patients treated for tuberculosis in high-burden countries: a multicentre cohort study. *Lancet Infect Dis.*  
589 2019 Feb 7. doi: 10.1016/S1473-3099(18)30673-X.

## Supporting Information

591  
592  
593 **S1 Table. STROBE checklist.**

594  
595 **S2 Table. Independent Ethics Committee or Institutional Review Board approvals obtained by**  
596 **participating IeDEA sites.**

597  
598 **S3 Table. Computation of stabilized inverse probability weights.**

599  
600 **S4 Table. Summary of the number (%) of positive and negative bacteriologic test results in patients with**  
601 **more than one test type performed.** (A) AFB smear + culture, (B) AFB smear + NAAT, (C) Culture +  
602 NAAT.

603  
604 **S5 Table. Propensity model results in the log of odds ratio scale.**

605  
606 **S6 Table. Propensity model results in odds ratio scale.**

607  
608 **S7 Table. Inverse probability weighted Cox proportional hazards model for hazard of death within 12**  
609 **months following TB treatment initiation conditional on receiving a TB bacteriologic test (positive or**  
610 **negative).** Includes imputation of CD4 count, body mass index (BMI), and antiretroviral treatment (ART) status  
611 at TB treatment initiation.

612  
613 **S8 Table: Membership of the International Epidemiology Databases to Evaluate AIDS (IeDEA)**  
614 **participating programs.**

615

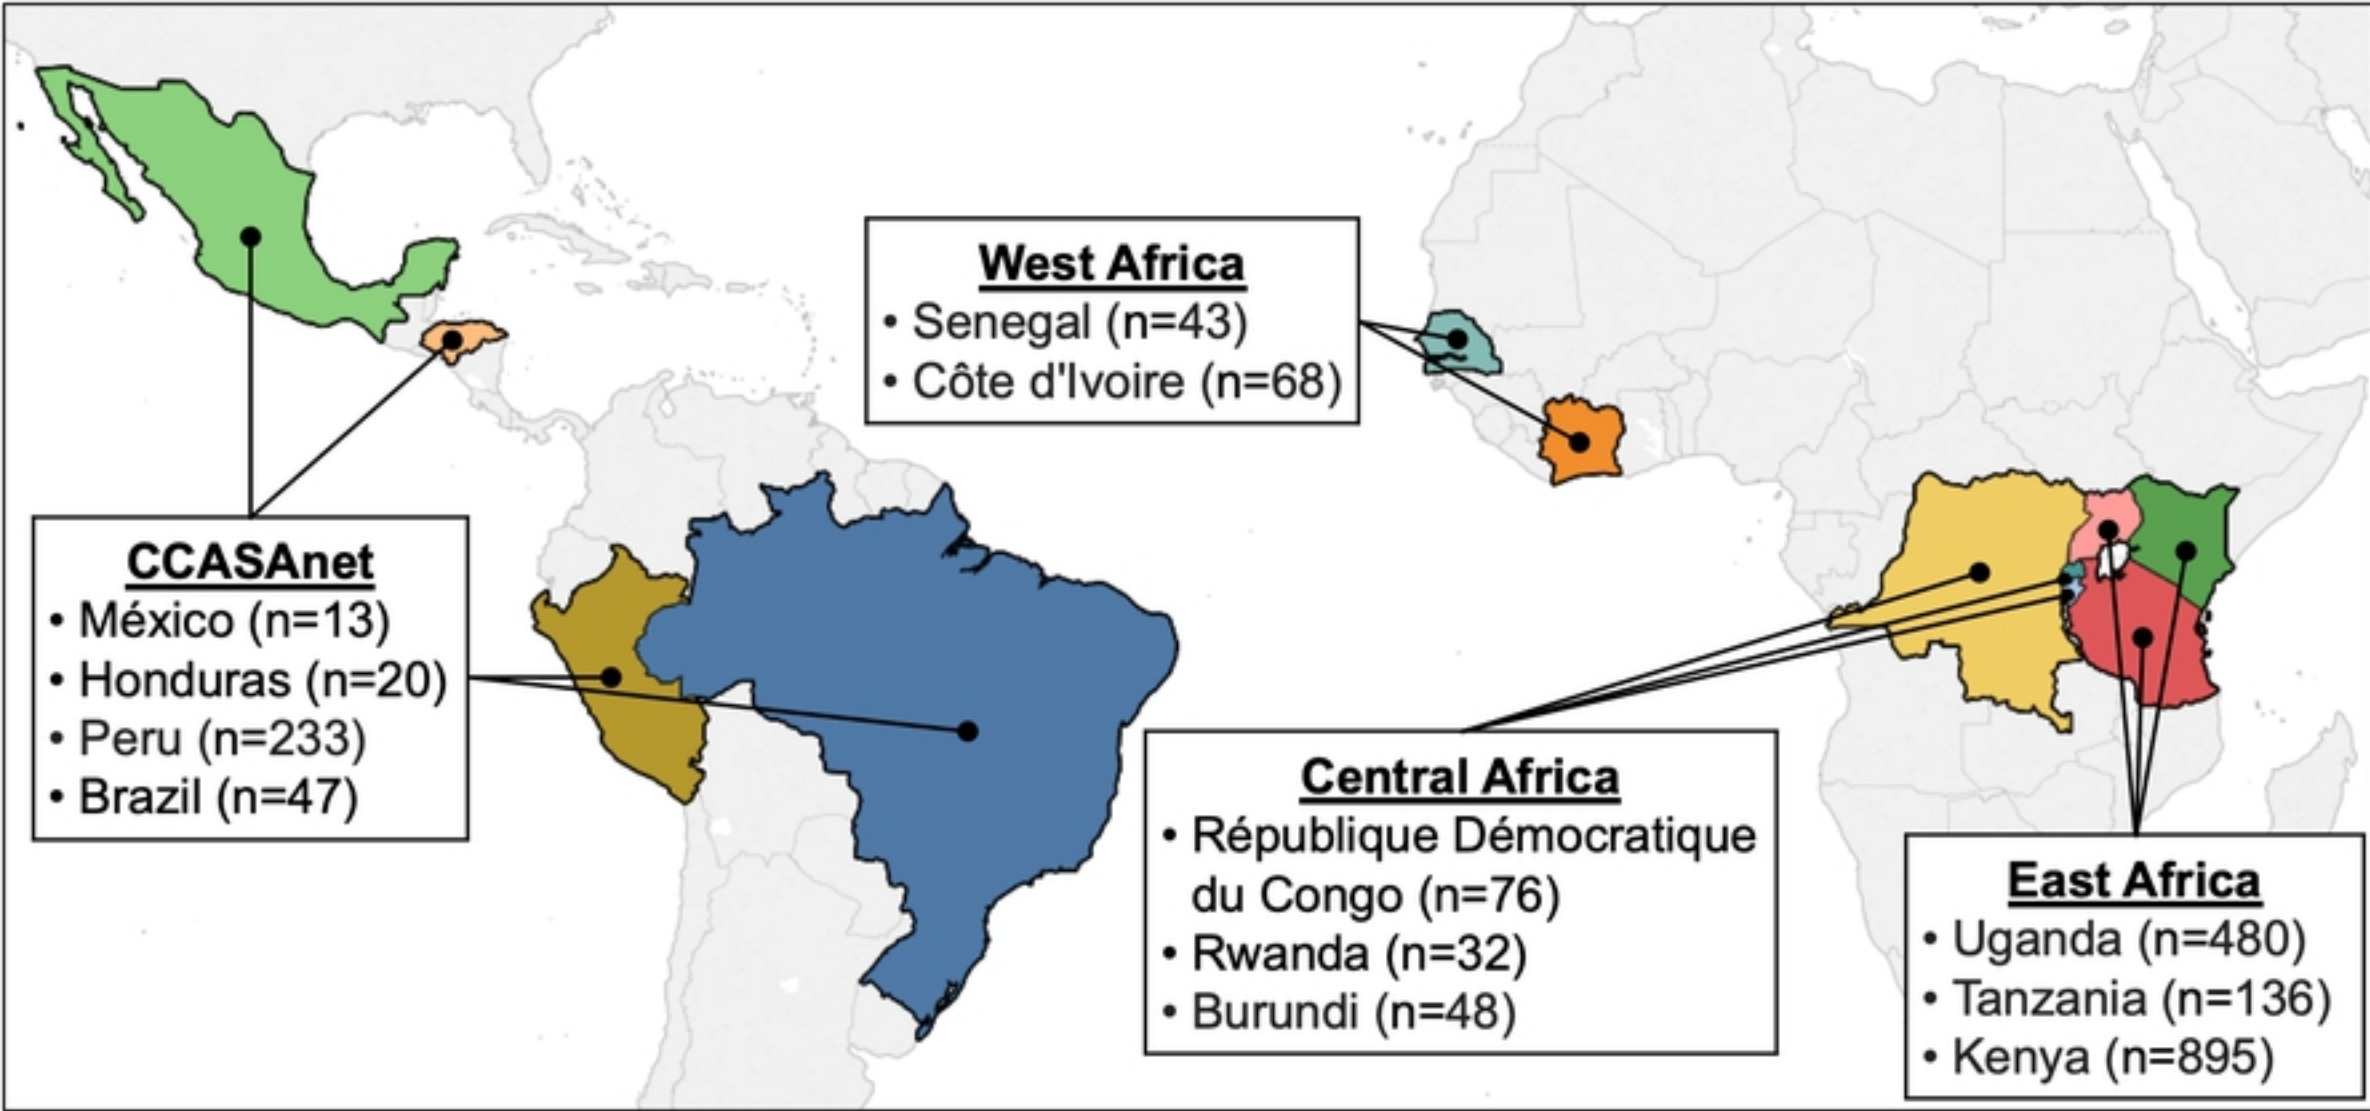

Fig 1



bioRxiv preprint doi: <https://doi.org/10.1101/571000>; this version posted March 8, 2019. The copyright holder for this preprint (which was not certified by peer review) is the author/funder, who has granted bioRxiv a license to display the preprint in perpetuity. It is made available under aCC-BY 4.0 International license.

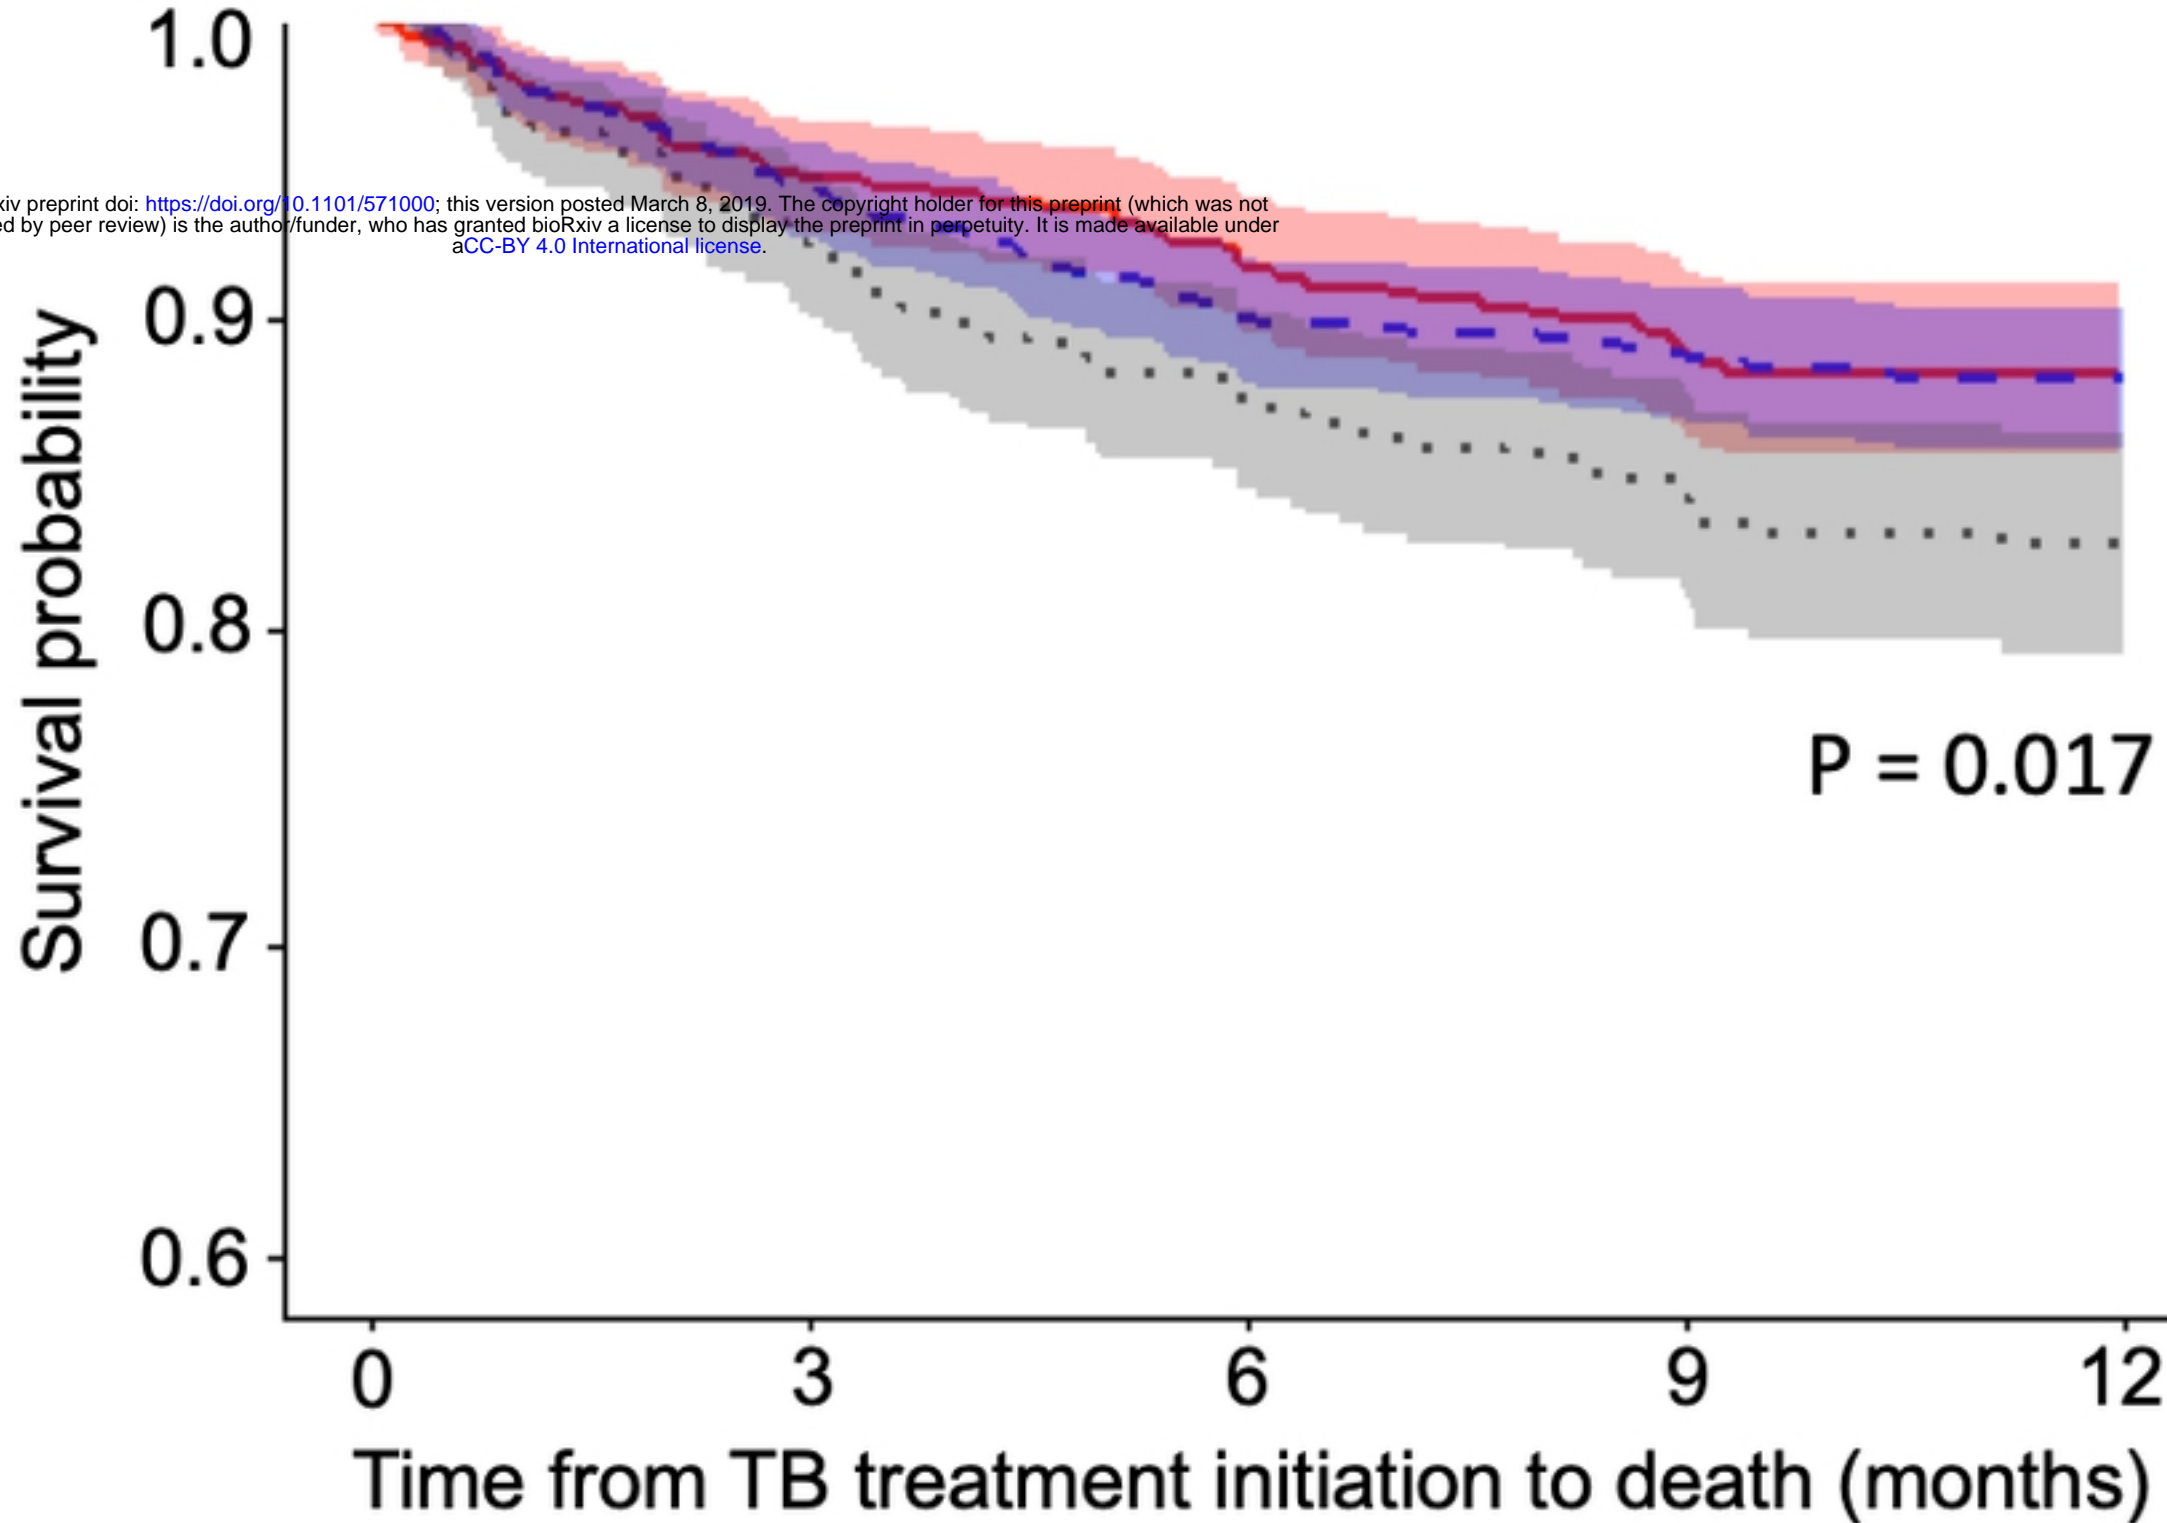

| <u>Bacteriologic test group</u> | <u>Number at risk</u> |     |     |     |   |
|---------------------------------|-----------------------|-----|-----|-----|---|
| <b>Positive test</b>            | 615                   | 556 | 475 | 373 | 0 |
| <b>Negative test</b>            | 907                   | 810 | 705 | 524 | 3 |
| <b>No test</b>                  | 569                   | 452 | 382 | 297 | 3 |

Fig 2
